# Supplementary material
Source: Royal Society of Chemistry journal article supplement (doi:10.1039/d5an01339a)
Supplement: d5an01339a1.pdf [file d5an01339a1.pdf]

## Supplementary Information:

### Multi-Modal Structure Characterization of Synthetic Batch Impurities with Liquid Chromatography Coupled to Infrared Ion Spectroscopy

Teun van Wieringen<sup>1,2</sup>, Simon Perry<sup>3</sup>, Agisilaos Chantzis<sup>3</sup>, Jos Oomens<sup>1,2</sup>, Giel Berden<sup>1,2</sup>, Mansoor Saeed<sup>3</sup> Jonathan Martens<sup>1,2</sup>

1. HFML-FELIX, Toernooiveld 7, Nijmegen, 6525 ED, The Netherlands

2. Institute for Molecules and Materials, Radboud University, Heyendaalseweg 135, Nijmegen, 6525 AJ, The Netherlands

3. Syngenta, Jealott's Hill International Research Centre, RG42 6EY Bracknell, Berkshire, United Kingdom

#### Content:

Figure S1. Extracted ion chromatograms of the main product and impurities and Gaussian fits.

Table S1. Similarity scores for the comparison of the IRIS spectra of the impurities with the reference materials.

Figure S2. Alternative calculated IR spectra for impurity **2**.

Figure S3. High-resolution Mass spectra of the main product and impurities.

Figure S3. CID MS/MS spectra of the main product and impurities.

Figure S4. Alternative calculated IR spectra for impurity **5**.

Figure S5. CID MS/MS spectra of the main product and impurities.

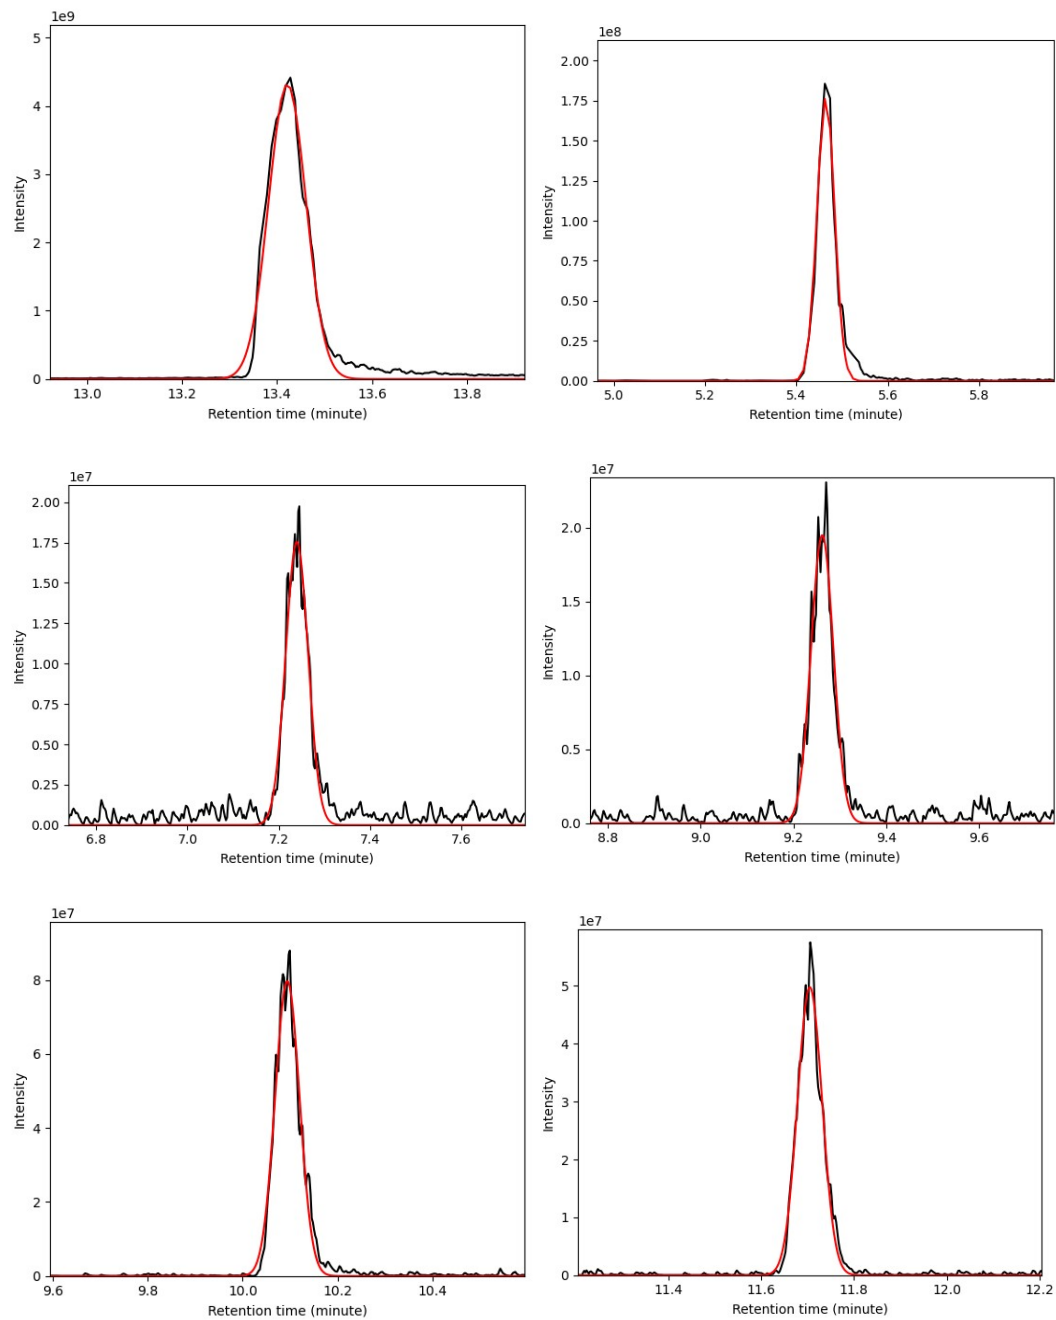

**Figure S1.** Extracted ion chromatograms of the protonated ions of main product and impurities 1- 5 (black traces, from left to right and top to bottom). Red traces are fitted Gaussians used for integration.

**Table S1.** Similarity scores for the comparison of the IRIS spectra of the impurities with the reference materials. For impurity 1, 2 and 3, the highest score is found to the corresponding reference standard, indicated in green.

|                                    | reference 1 | reference 3 | active ingredient |
|------------------------------------|-------------|-------------|-------------------|
| impurity 1                         | 985         | 889         | 822               |
| impurity 2                         | 906         | 925         | 836               |
| impurity 3                         | 887         | 985         | 912               |
| impurity 4: reconverted to m/z 360 | 859         | 937         | 974               |
| impurity 4                         | 877         | 930         | 921               |
| impurity 5                         | 902         | 952         | 913               |

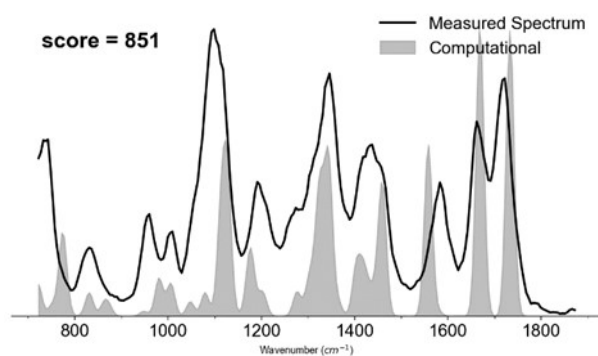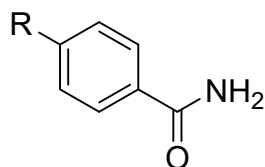

Assigned structure impurity

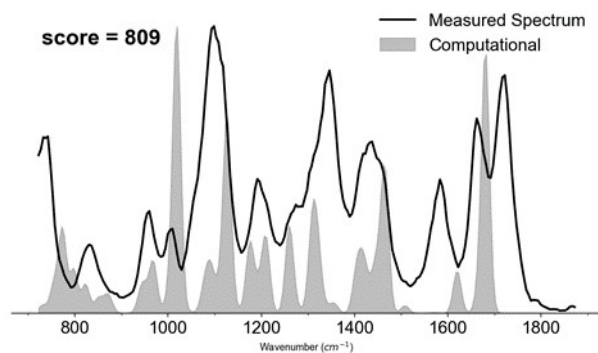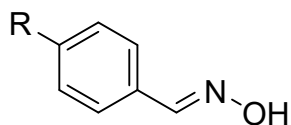

Alternative aldoxime

**Figure S2.** Comparison of the measured IRIS spectrum of impurity 2 with different candidates. We assign the impurity structure as the top candidate.

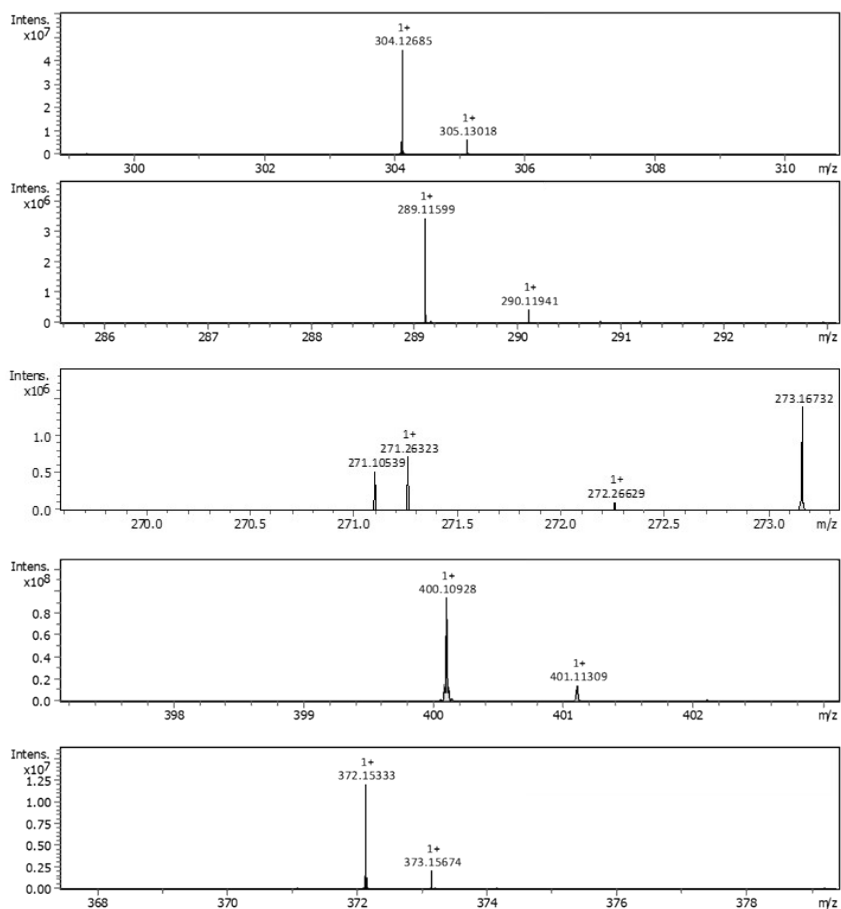

**Figure S3.** High resolution mass spectra of the sodium adducts of Impurity 1-5 (from top to bottom). The observed masses deviate from the theoretical accurate masses by 0.24, 0.39, 0.28, 0.51, and 0.91 ppm, respectively.

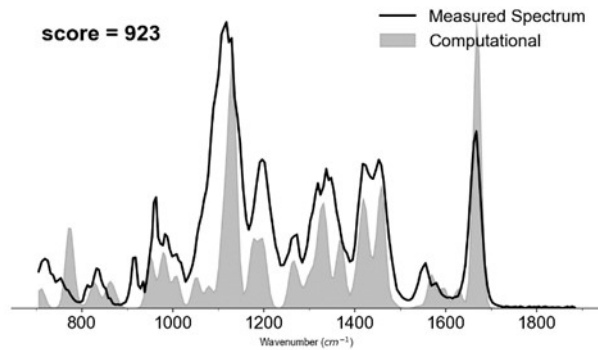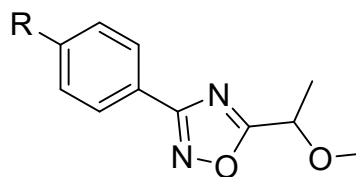

Assigned structure impurity

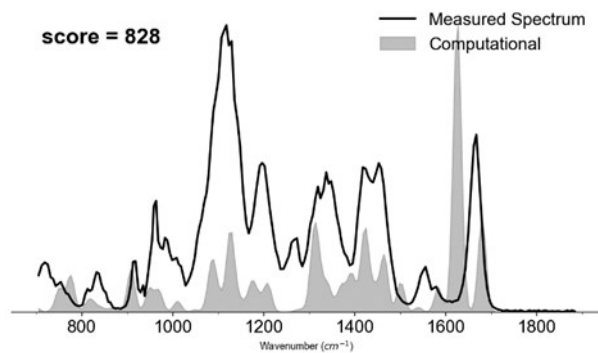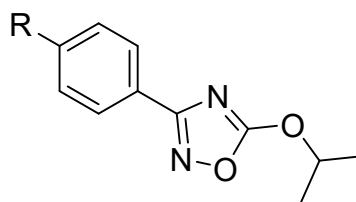

Alternative isopropanoxy candidate

**Figure S4.** Comparison of the measured IRIS spectrum of impurity 5 with different candidates. We assign the impurity structure as the top candidate.

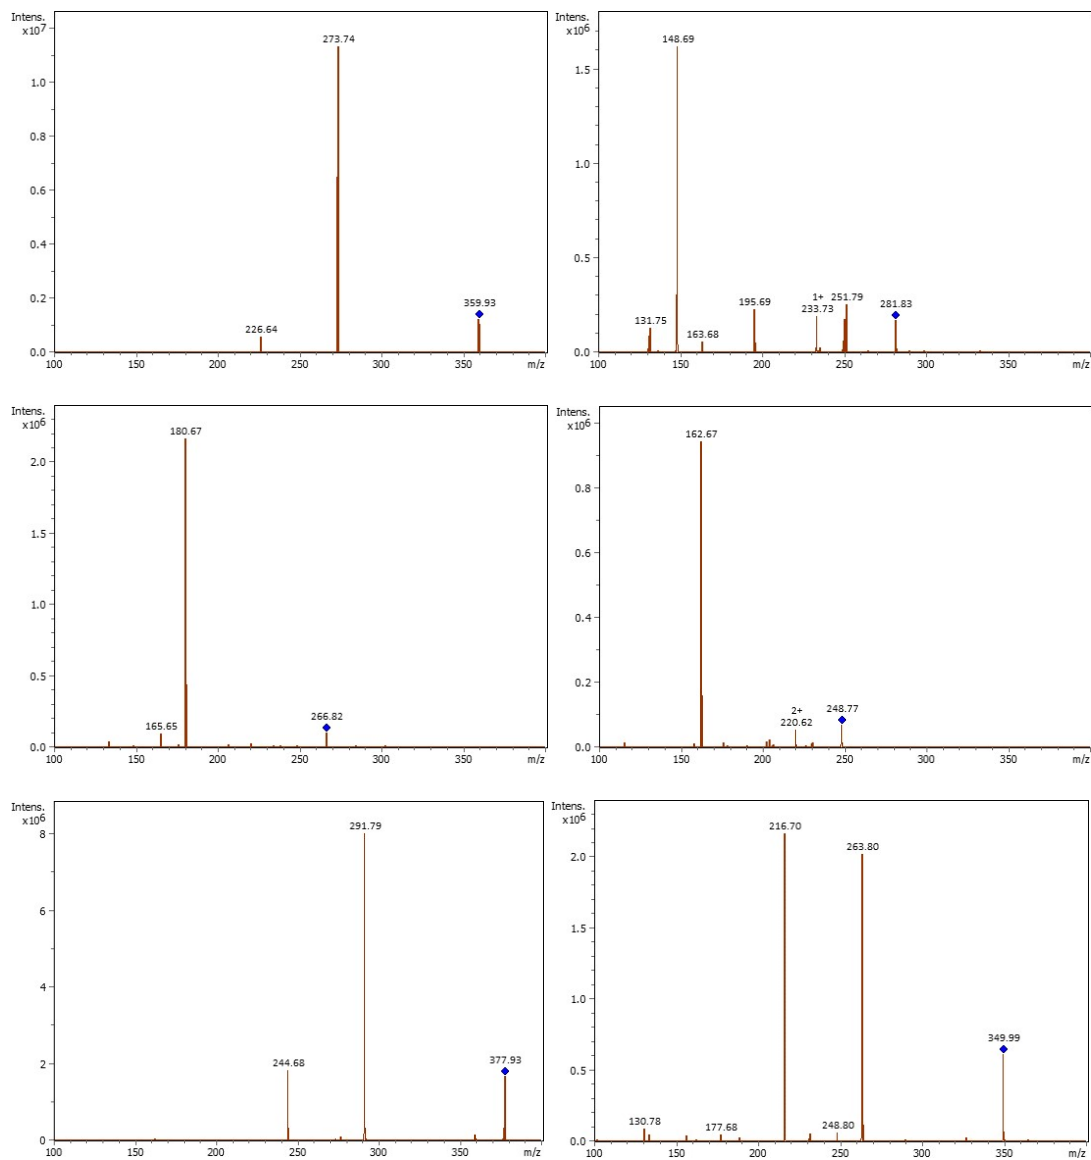

**Figure S5.** CID MS/MS spectra of the protonated ions of main product and impurities **1-5** (from left to right and top to bottom).
